# Supplementary material for: Mapping the immunopeptidome of seven SARS-CoV-2 antigens across common HLA haplotypes
Source: PubMed Central journal article supplement — Nat Commun. 2024 Aug 30;15:7547. doi: 10.1038/s41467-024-51959-6 (PMC11364864; doi:10.1038/s41467-024-51959-6), 2024-08-30
Supplement: 41467_2024_51959_MOESM3_ESM.pdf [file 41467_2024_51959_MOESM3_ESM.pdf]

### **Description of Additional Supplementary Files**

File Name: Supplementary Data 1

Description: Sars CoV\_2 peptides

File Name: Supplementary Data 2

Description: Peptides from bLCL 9004

File Name: Supplementary Data 3

Description: Peptides from bLCL 9087

File Name: Supplementary Data 4

Description: SARS peptide cross reactivity with human peptides

File Name: Supplementary Data 5

Description: T cell assay data

File Name: Supplementary Data 6

Description: SARS-CoV\_2 variants
